# Supplementary material for: Functional activity level reported by an informant is an early predictor of Alzheimer’s disease
Source: PubMed Central journal article supplement (PMC10067216; doi:10.1186/s12877-023-03849-7), 2023-03-31
Supplement: 12877_2023_3849_MOESM1_ESM.pdf [file 12877_2023_3849_MOESM1_ESM.pdf]

**Table 1.** Characteristics of the correctly and miss-classified sMCI and cAD.

|                                          | False Negative | False Positive | True Negative | True Positive |
|------------------------------------------|----------------|----------------|---------------|---------------|
| <b>Demographics</b>                      |                |                |               |               |
| N                                        | 20             | 17             | 58            | 45            |
| Sex (F:M)                                | 8:12           | 7:10           | 25:33         | 17:28         |
| Age [years]: mean (SD)                   | 74 (8.3)       | 76 (5.5)       | 72 (7.5)      | 74 (7.0)      |
| Education [years]: mean (SD)             | 16.1 (2.5)     | 16.8 (3.5)     | 16.0 (2.9)    | 15.4 (2.8)    |
| Participation length [years]: mean (SD)  | 6.1 (2.8)      | 3.4 (2.7)      | 4.8 (2.7)     | 5.3 (2.9)     |
| <b>Cognitive function</b>                |                |                |               |               |
| RAVLT immediate recall: mean number (SD) | 37.2 (6.7)     | 29.1 (6.2)     | 39.1(8.7)     | 27.8(4.8)     |
| RAVLT delayed: mean number (SD)          | 4.3 (3.2)      | 1.2 (1.3)      | 5.7 (3.5)     | 1.5 (1.9)     |
| RAVLT recognition: mean number (SD)      | 11.6 (2.6)     | 9.0 (3.6)      | 12.1 (2.6)    | 9.0 (3.7)     |
| TMTA: mean seconds (SD)                  | 41 (29)        | 43 (8)         | 37 (12)       | 45 (25)       |
| TMTB: mean seconds (SD)                  | 115 (82)       | 131 (56)       | 93 (36)       | 140 (80)      |
| CFT animals: mean number (SD)            | 16.9 (4.7)     | 16.2 (5.6)     | 18.7 (4.7)    | 15.2 (4.1)    |
| <b>MRI measures</b>                      |                |                |               |               |
| LVV (eTIV normalized): mean (SD)         | 0.025 (0.010)  | 0.030(0.011)   | 0.023 (0.011) | 0.030 (0.015) |
| Hippocampus (eTIV normalized): mean (SD) | 0.0045 (0.00)  | 0.0037(0.00)   | 0.0046 (0.00) | 0.0038 (0.00) |
| <b>Functional levels</b>                 |                |                |               |               |
| GDS: mean (SD)                           | 1.5 (1.2)      | 1.6 (0.9)      | 1.9 (1.4)     | 1.4 (1.2)     |
| FAQ Total: mean (SD)                     | 1.8 (2.3)      | 4.4 (4.8)      | 1.8 (3.7)     | 5.7 (4.8)     |
| FAQ Bills: mean (SD)                     | 0.2 (0.4)      | 1.0 (1.1)      | 0.3 (0.7)     | 0.6 (0.8)     |
| FAQ Taxes: mean (SD)                     | 0.2 (0.5)      | 0.8 (0.9)      | 0.2 (0.6)     | 1.1 (1.0)     |
| FAQ Shopping: mean (SD)                  | 0.1 (0.3)      | 0.3 (0.7)      | 0.1 (0.4)     | 0.4 (0.7)     |
| FAQ Games: mean (SD)                     | 0.3 (0.7)      | 0.4 (0.8)      | 0.1 (0.4)     | 0.4 (0.6)     |
| FAQ Beverage/Stove: mean (SD)            | 0.0 (0.0)      | 0.1 (0.5)      | 0.0 (0.4)     | 0.1 (0.3)     |
| FAQ Meal Prep: mean (SD)                 | 0.3 (0.6)      | 0.1 (0.3)      | 0.1 (0.5)     | 0.4 (0.6)     |
| FAQ Events: mean (SD)                    | 0.2 (0.5)      | 0.2 (0.6)      | 0.1 (0.4)     | 0.5 (0.9)     |
| FAQ Pay Attention (TV): mean (SD)        | 0.2 (0.4)      | 0.4 (0.6)      | 0.2 (0.4)     | 0.4 (0.6)     |
| FAQ Remember Dates: mean (SD)            | 0.4 (0.7)      | 0.8 (0.8)      | 0.3 (0.7)     | 1.1 (0.8)     |
| FAQ Travel: mean (SD)                    | 0.2 (0.5)      | 0.4 (0.6)      | 0.2 (0.7)     | 0.7 (0.8)     |

RAVLT: Rey Auditory Verbal Learning Test, TMT: Trail Making Test part A and B, CFT: Category Fluency Test; LVV: lateral ventricle volumes, GDS: Geriatric Depression Scale, FAQ: Functional Activity Questioner, False negative (FN): predicted sMCI while observed (true) outcome cAD, False Positive (FP): predicted cAD when observed (true) outcome is sMCI, True Negative (TN): predicted and observed (true) outcome is sMCI, True Positive (TP): predicted and observed (true) outcome is cAD.
