# Supplementary material for: Functional activity level reported by an informant is an early predictor of Alzheimer’s disease
Source: PubMed Central journal article supplement (PMC10067216; doi:10.1186/s12877-023-03849-7), 2023-03-31

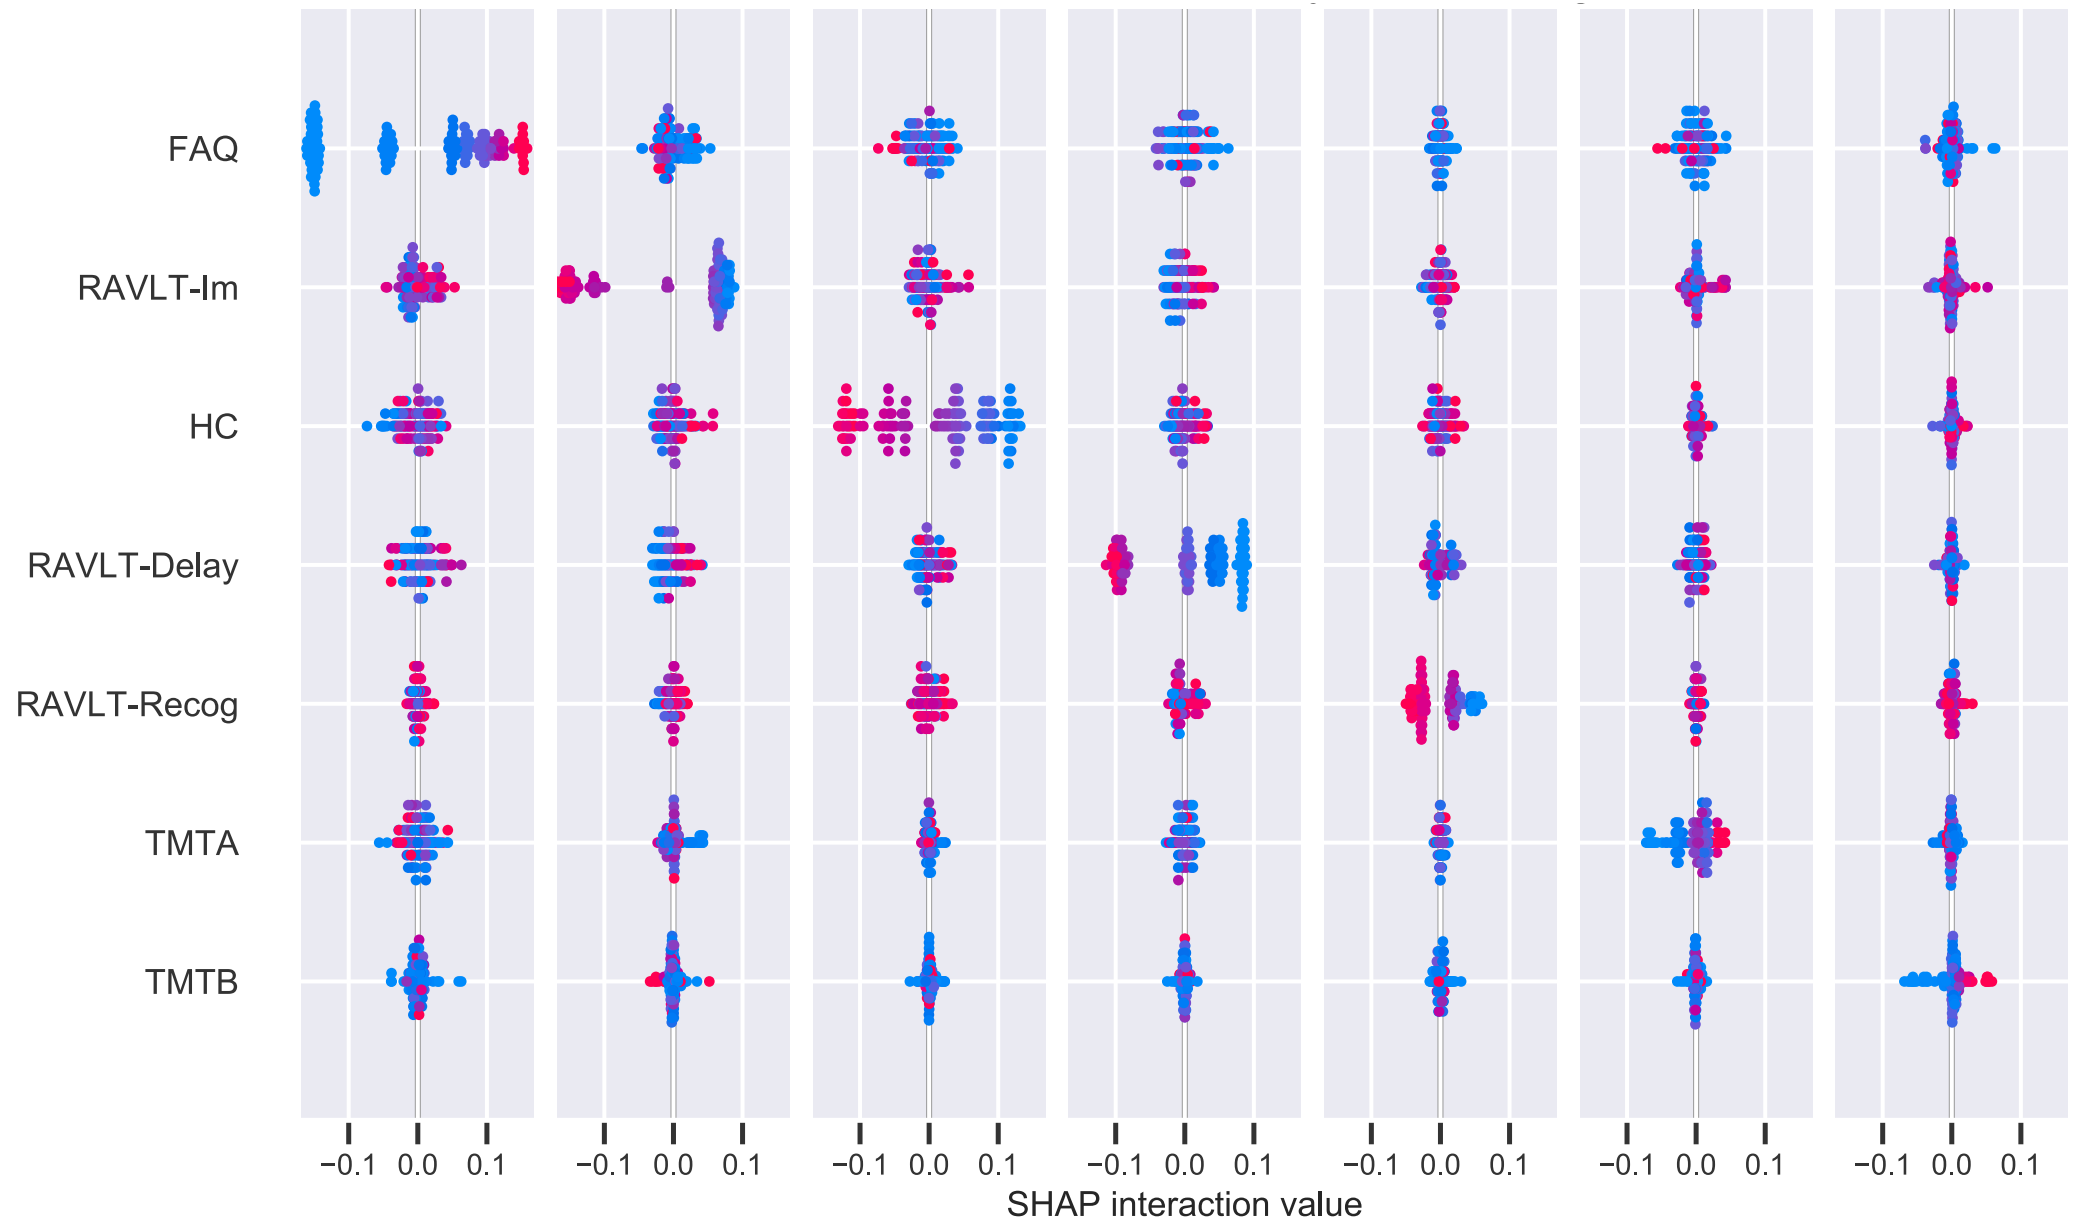

Supplement: 12877_2023_3849_MOESM2_ESM.pdf [file 12877_2023_3849_MOESM2_ESM.pdf]
